# Supplementary material
Source: PubMed Central journal article supplement (PMC2440596)

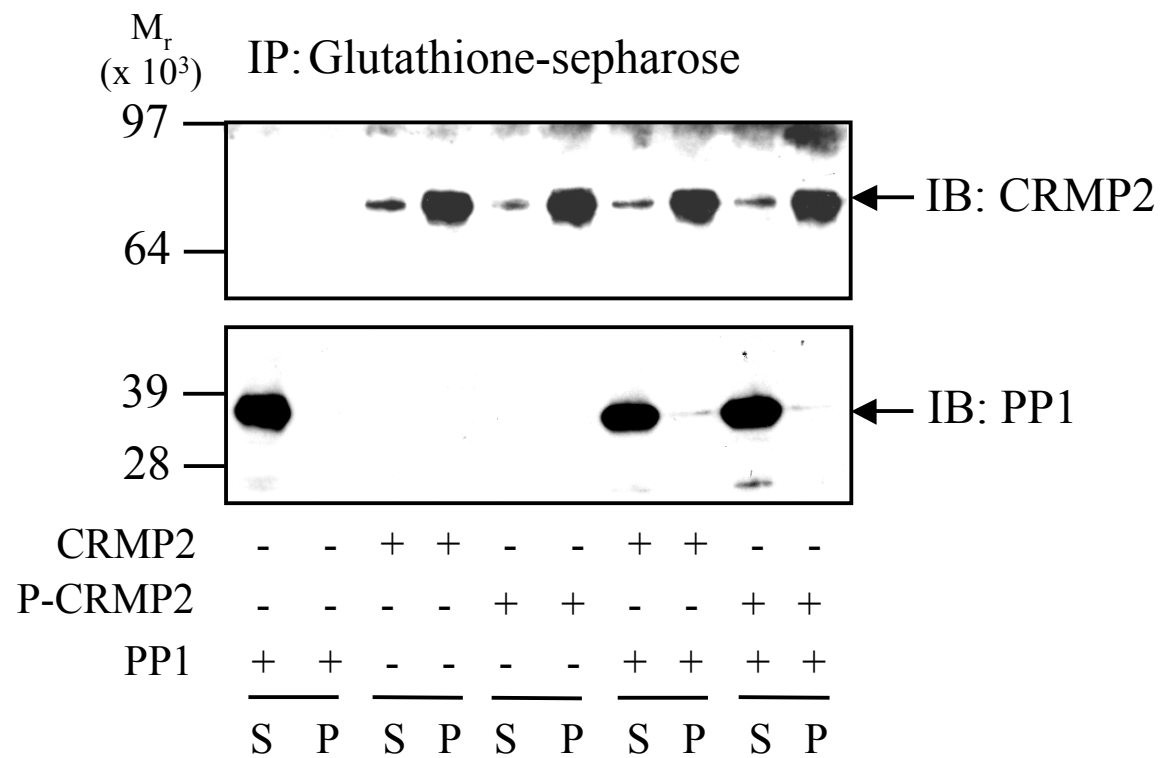

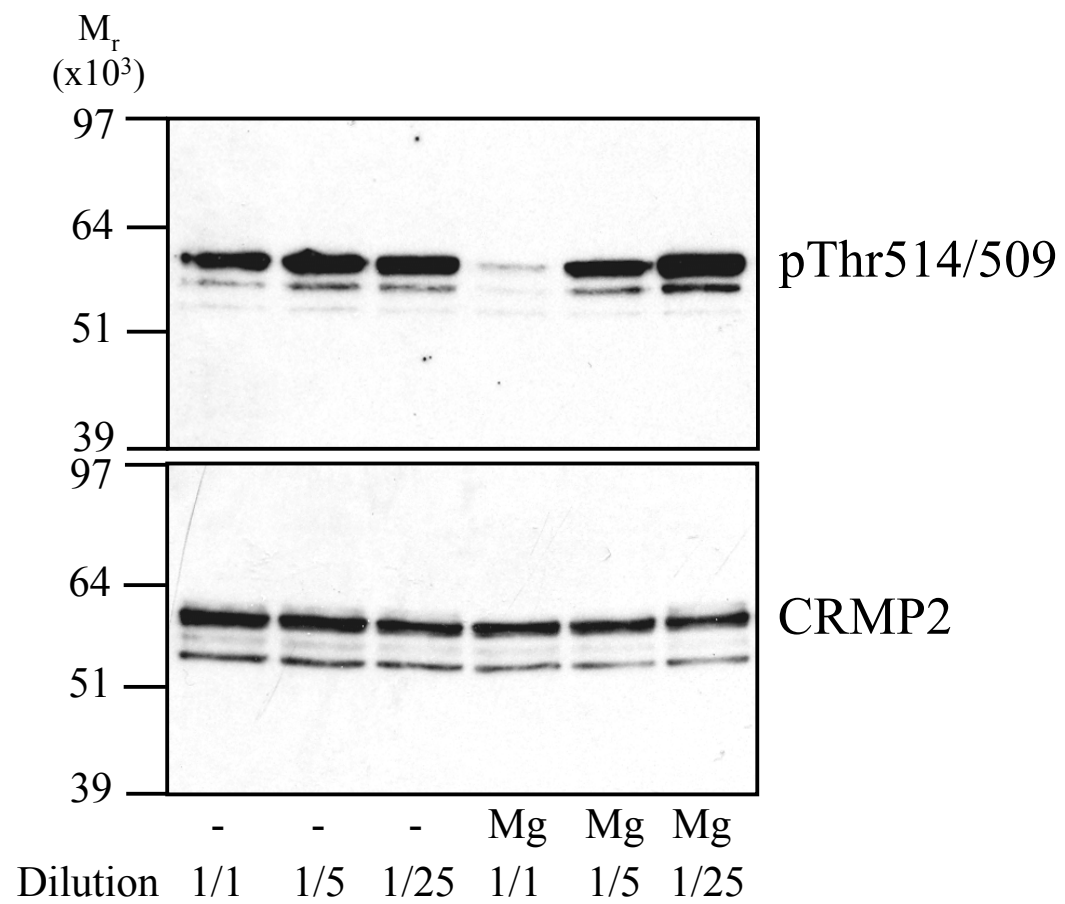

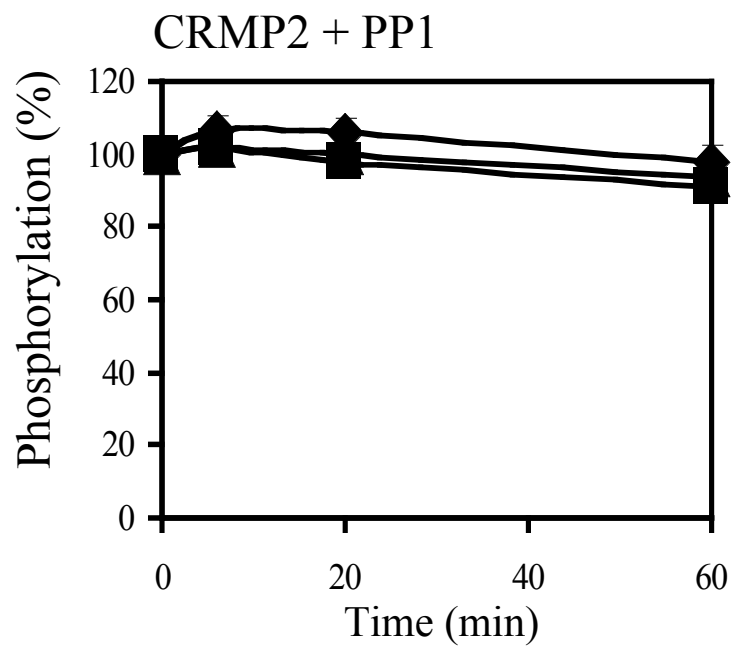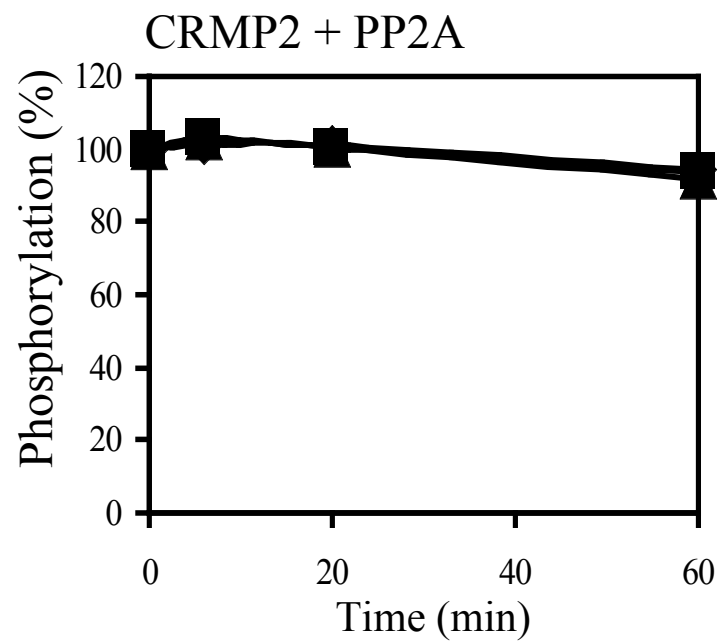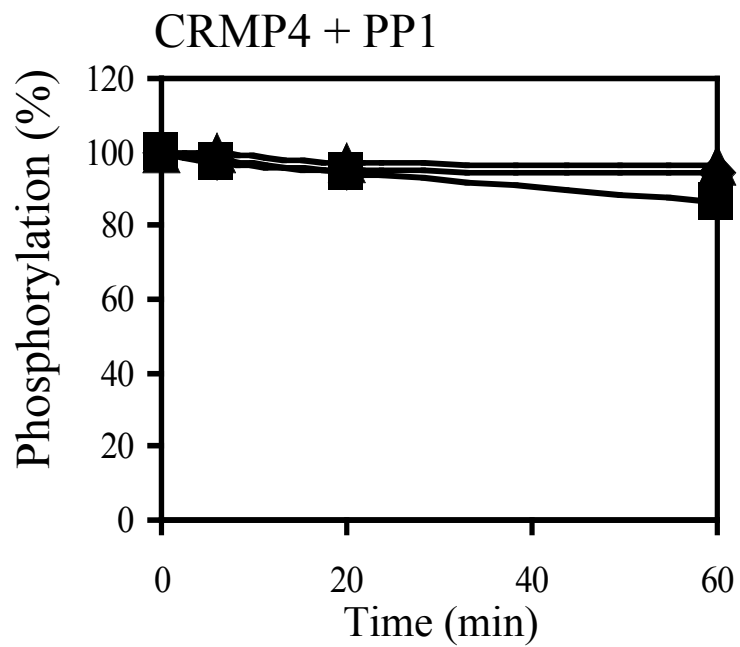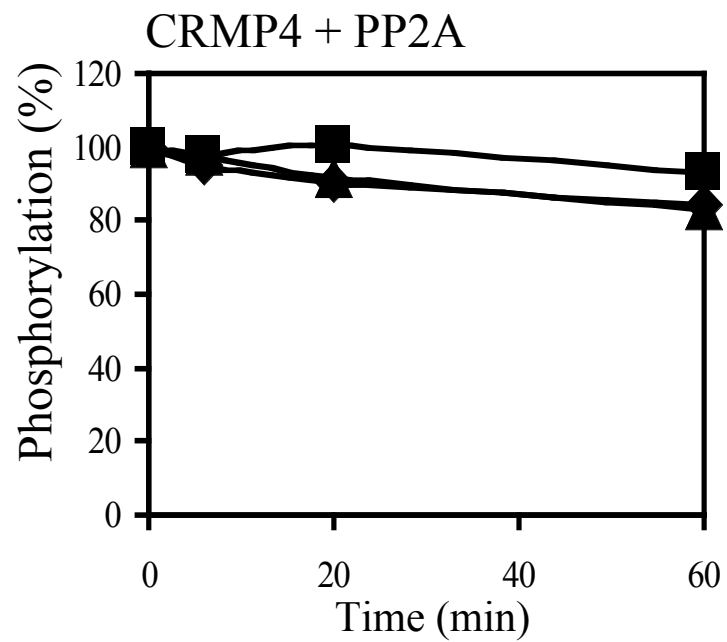

Supplement: M801645200_1.pdf [file M801645200_1.pdf]
